# Supplementary material for: Cooperatively rearranging regions change shape near the mode-coupling crossover for colloidal liquids on a sphere
Source: Springer Nature journal article supplement (doi:10.1038/s41467-020-18760-7), 2020-10-02
Supplement: MOESM3 [file 41467_2020_18760_MOESM3_ESM.pdf]

## Description of Additional Supplementary Files

### Supplementary Movie 1

Three-dimensional view of bi-dispersed colloidal particles wrapped on the surface of the  $S^2$  sphere for  $\Gamma = 63$ .

### Supplementary Movie 2

Particle trajectories for  $\Gamma = 22$  and  $\Gamma = 63$  on the surface of the  $S^2$  sphere. Particles show diffusive motion at  $\Gamma = 22$ . Whereas for  $\Gamma = 63$ , particles remain caged for a long time.

### Supplementary Movie 3

Particle displacement map over the cage-breaking time  $t^*$  for  $\Gamma = 22$ . Particles are colored according to their overlap values with red representing high particle overlaps over  $t^*$  and blue representing poor overlaps. Here, a poor overlap is an indication of a particle hopping out of its cage.

### Supplementary Movie 4

Particle displacement map over the cage-breaking time  $t^*$  for  $\Gamma = 63$ . The system is dynamically heterogeneous behavior and rearrangements are cooperative. Here the color maps are same as in **Supplementary Movie 3**.

### Supplementary Movie 5

Particle trajectories on the surface of an  $S^2$  sphere show intermittent caging with abrupt hops, behavior typical of deeply supercooled liquids in 3D-Euclidean space.
